# Supplementary material for: Analysis of Density Altitude Characteristics at Chinese Airports
Source: Preprints.org preprint supplement (doi:10.20944/preprints202311.0096.v1), 2023-11-01
Supplement: Supplementary file 2 [file supplementary]

| ICAO code | Station Name | Elevation |
| --- | --- | --- |
| ZBAA | Beijing | 30 |
| ZBHH | Hohhot | 1065 |
| ZBSJ | Shijiazhuang | 71 |
| ZBTJ | Tianjin | 3 |
| ZBYN | Taiyuan | 779 |
| ZGGG | Guangzhou | 15 |
| ZGHA | changsha | 66 |
| ZGKL | Guilin | 166 |
| ZGNN | Nanning | 73 |
| ZGOW | Shantou | 3 |
| ZGSZ | Shenzhen | 18 |
| ZHCC | Zhengzhou | 111 |
| ZHHH | Wuhan | 23 |
| ZJHK | Haikou | 23 |
| ZJSY | Sanya | 27 |
| ZLLL | Lanzhou | 1947 |
| ZLXY | Xi'an | 479 |
| ZSAM | Xiamen | 139 |
| ZSFZ | Fuzhou | 85 |
| ZSHC | Hangzhou | 43 |
| ZSNB | Ninbo | 4 |
| ZSNJ | Nanjing | 33 |
| ZSPD | Shanghai | 4 |
| ZSSS | Shanghai | 7 |
| ZUCK | Chongqing | 351 |
| ZUGY | Guiyang | 1185.2192 |
| ZUUU | Chengdu | 508 |
| ZWSH | Kashi | 1291 |
| ZWWW | Urumqi | 654 |
| ZWYN | Yining | 671.3994 |
| ZYCC | Changchun | 238 |
| ZYHB | Harbin | 140 |
| ZYTL | Dalian | 97 |
| ZYTX | Shenyang | 35 |

Table S1. Details of Chinese airports information.
